# Supplementary material
Source: PubMed Central journal article supplement (PMC4866594)
Supplement: NIHMS784841-supplement-01.pdf [file NIHMS784841-supplement-01.pdf]

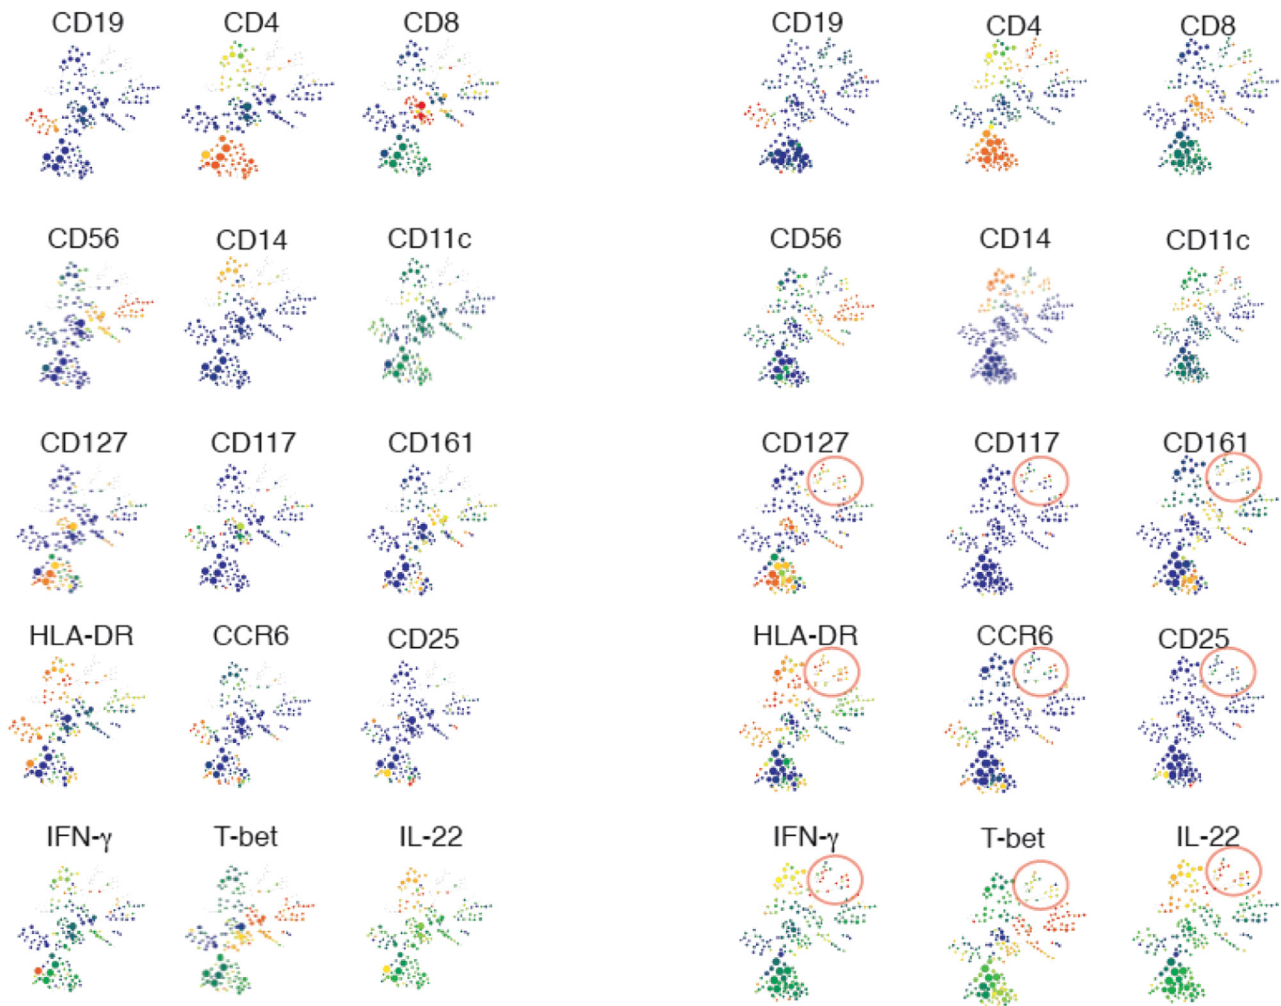

**FIG E1.** Overlaid expression patterns of CD19, CD4, CD8, CD56, CD14, CD11c, CD127, CD117, CD161, HLA-DR, CCR6, CD25, T-bet, IFN- $\gamma$ , and IL-22. Node color was scaled to the median intensity of marker expression of the cells within each node expressed as a percentage of the maximum value in the data set displayed. One representative experiment of 4 is displayed.

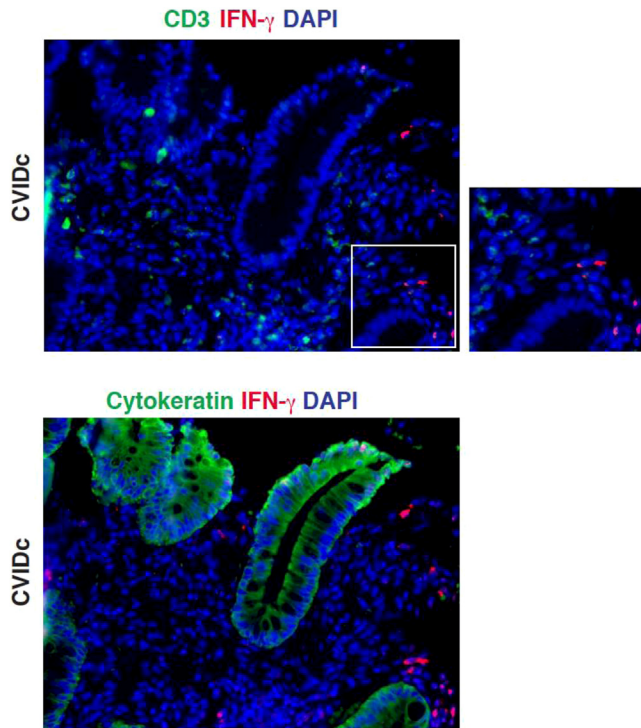

**FIG E2.** Gastrointestinal biopsy specimens of jejunum of a patient with CVID with enteropathy stained for CD3 (*left panel*) or cytokeratin (*right panel*; *green*) and IFN- $\gamma$  (*red*) and counterstained with 4',6-diamidino-2-phenylindole dihydrochloride (*DAPI*) for nuclei (*blue*). Original magnification  $\times 40$ .

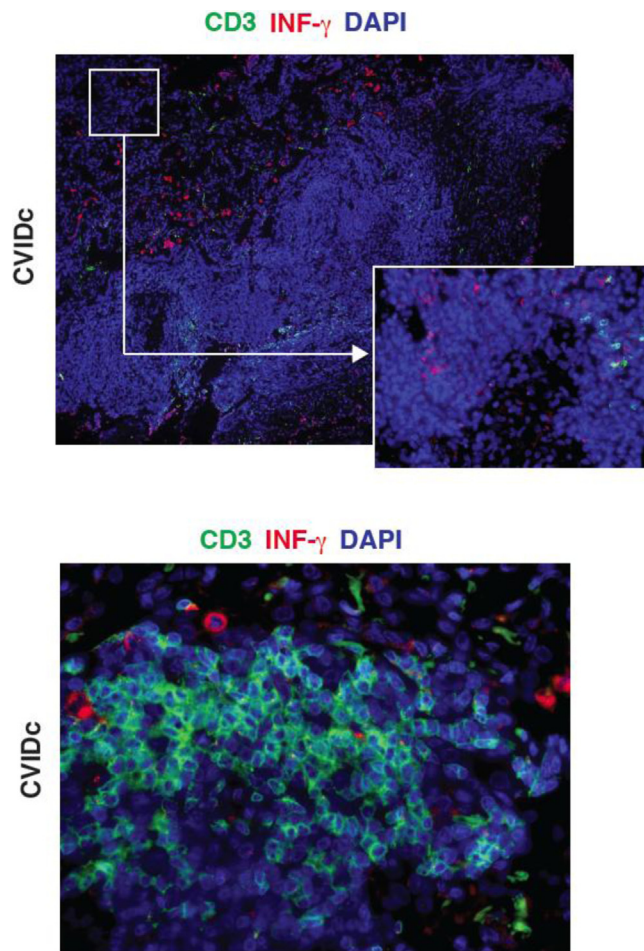

**FIG E3.** Lung biopsy specimens of a patient with CVID given a diagnosis of lymphocytic interstitial pneumonitis (*upper panels, CVIDc*) and a patient with CVID given a diagnosis of reactive lymphoid hyperplasia. Tissue was stained for CD3<sup>+</sup> T cells (*green*) and IFN- $\gamma$  (*red*) and counterstained with 4',6-diamidino-2-phenylindole dihydrochloride (*DAPI*) for nuclei (*blue*). *White squares* indicate area of inset magnification. Original magnification  $\times 10$  (inset).

**TABLE E1.** Antibodies used in flow cytometry and immunofluorescence

| Antigen            | Label       | Isotype                    | Clone       | Source          | Use |
|--------------------|-------------|----------------------------|-------------|-----------------|-----|
| CD1d               | PE          |                            |             | ‡               | FC  |
| CD2                | PE          | Mouse, IgG <sub>1</sub> κ  | RPA-2.10    | BD              | FC  |
| CD3                |             | Rat, IgG <sub>1</sub>      | CD3-12      | AbD             | IF  |
| CD3                | PerCP-Cy5.5 | Mouse, IgG <sub>1</sub> κ  | eBio4B10    | eBioscience     | FC  |
| CD3                | APC-eF780   | Mouse, IgG <sub>1</sub> κ  | SK7         | eBioscience     | FC  |
| CD3                | BV 450      | Mouse, IgG <sub>1</sub> κ  | MI15        | BD              | FC  |
| CD4                | FITC        | Mouse, IgG <sub>1</sub> κ  | L200        | BD              | FC  |
| CD8                | PE          | Mouse, IgG <sub>1</sub> κ  | Leu-2a      | BD              | FC  |
| CD11c              | APC-Cy7     | Mouse, IgG <sub>1</sub> κ  | 3.9         | eBioscience     | FC  |
| CD11c              | eFluor 450  | Mouse, IgG <sub>1</sub> κ  | 3.9         | eBioscience     | FC  |
| CD14               | PE          | Mouse, IgG <sub>2a</sub> κ | M5E2        | BD              | FC  |
| CD14               | APC-Cy7     | Mouse, IgG <sub>1</sub> κ  | HCD14       | BioLegend       | FC  |
| CD16               | BV 450      | Mouse, IgG <sub>1</sub> κ  | 3G8         | BD              | FC  |
| CD19               | FITC        | Mouse, IgG <sub>1</sub> κ  | 4G7         | BD              | FC  |
| CD19               | PerCP-Cy5.5 | Mouse, IgG <sub>1</sub> κ  | HIB19       | eBioscience     | FC  |
| CD19               | APC-Cy7     | Mouse, IgG <sub>1</sub> κ  | HIB19       | BioLegend       | FC  |
| CD25               | APC         | Mouse, IgG <sub>1</sub> κ  | M-A251      | BD              | FC  |
| CD27               | PerCP-Cy5.5 | Mouse, IgG <sub>1</sub> κ  | M-T271      | BD              | FC  |
| CD45               | PE-Cy7      | Mouse, IgG <sub>1</sub> κ  | H130        | BD              | FC  |
| CD49d (a4)         | APC         | Mouse, IgG <sub>1</sub> κ  | 9F10        | BioLegend       | FC  |
| CD56               | APC         | Mouse, IgG <sub>1</sub> κ  | CMSSB       | eBioscience     | FC  |
| CD56               | BV605       | Mouse, IgG <sub>2b</sub> κ | NCAM16.2    | BD              | FC  |
| CD90 (Thy-1)       | PE-Cy7      | Mouse, IgG <sub>1</sub> κ  | 5E10        | BioLegend       | FC  |
| CD103              | PE-Cy7      | Mouse, IgG <sub>1</sub> κ  | B-Ly7       | eBioscience     | FC  |
| CD117 (c-Kit)      | PE-Cy7      | Mouse, IgG <sub>1</sub> κ  | 104D2       | eBioscience     | FC  |
| CD123              | FITC        | Mouse, IgG <sub>2a</sub> κ | 7G3         | BD              | FC  |
| CD127              | FITC        | Mouse, IgG <sub>1</sub> κ  | eBioRDR5    | eBioscience     | FC  |
| CD127              | eFluor 450  | Mouse, IgG <sub>1</sub> κ  | eBioRDR5    | eBioscience     | FC  |
| CD196 (CCR6)       | PerCP-eF710 | Mouse, IgG <sub>1</sub> κ  | R6H1        | eBioscience     | FC  |
| CD212 IL-12Rβ      | PE          | Mouse, IgG <sub>1</sub> κ  | 2.4E6       | BD PharMingen   | FC  |
| CD335 (NKp46)      | APC         | Mouse, IgG <sub>1</sub> κ  | 9E2         | BioLegend       | FC  |
| CD336 (NKp44)      | APC         | Mouse, IgG <sub>1</sub> κ  | 2.29        | Miltenyi Biotec | FC  |
| CXCR3 (CD183)      | PE-Cy7      | Mouse, IgG <sub>1</sub> κ  | 1C6         | BD              | FC  |
| IFN-γ              |             | Rabbit                     | H-145†      | Santa Cruz      | IF  |
| IFN-γ              | FITC        | Mouse, IgG <sub>1</sub> κ  | 4S.B3       | BD              | FC  |
| IFN-γ              | PE          | Mouse, IgG <sub>1</sub> κ  | 4S.B3       | BD              | FC  |
| IL-17A             | PerCP-Cy5.5 | Mouse, IgG <sub>1</sub> κ  | eBio64DEC17 | eBioscience     | FC  |
| IL-22              | eFluor 450  | Mouse, IgG <sub>1</sub> κ  | 22URTI      | eBioscience     | FC  |
| Integrin β7        | APC         | Rat, IgG <sub>2</sub> ακ   | FIB504      | BioLegend       | FC  |
| MHC-II             | PE-Cy7      | Mouse, IgG <sub>1</sub> κ  | L243        | eBioscience     | FC  |
| NKG2A (CD159α)     | PE          | Mouse, IgG <sub>2b</sub>   | Z199        | Beckman         | FC  |
| NKG2D (CD314)      | PE          | Mouse, IgG <sub>1</sub>    | ON72        | Beckman         | FC  |
| Pan-cytokeratin    |             | Mouse, IgG <sub>1</sub>    | PCK-26      | Abcam           | IF  |
| RORc               |             | Rabbit                     | LS-A5191*   | LSBio           | IF  |
| RORγ(t)            | PE          | Rat, IgG <sub>2a</sub>     | AFKJ-9      | eBioscience     | FC  |
| T-cell receptor γδ | FITC        | Mouse, IgG <sub>1</sub> κ  | 11F2        | BD              | FC  |
| T-bet              | PE          | Mouse, IgG <sub>1</sub>    | eBio4B10    | eBioscience     | FC  |
| T-bet              | PerCP-Cy5.5 | Mouse, IgG <sub>1</sub>    | eBio4B10    | eBioscience     | FC  |

APC, Allophycocyanin; Cy, cyanin; FC, flow cytometry; FITC, fluorescein isothiocyanate; IF, immunofluorescence; PE, phycoerythrin; PerCP, peridinin-chlorophyll-protein complex.

\*Catalog number.

†Epitope.

‡Gift from A. Bonito, National Institutes of Health Tetramer Core Facility.

**TABLE E2.** Antibodies used in CyTOF analysis

| Antigen       | Isotope | Clone      | Source      |
|---------------|---------|------------|-------------|
| CCR6          | 141 Pr  | Go34E3     | Fluidigm    |
| CD19          | 142 Nd  | HIB19      | Fluidigm    |
| CD117         | 143 Nd  | 104D2      | Fluidigm    |
| CD4           | 145 Nd  | RPA-T4     | Fluidigm    |
| CD8           | 146 Nd  | RPA-T8     | Fluidigm    |
| CD20          | 147 Sm  | 2H7        | Fluidigm    |
| CD16          | 148 Nd  | 3G8        | Fluidigm    |
| CD66          | 149 Sm  | CD66a-B1.1 | Fluidigm    |
| CD123         | 151 Eu  | 6H6        | Fluidigm    |
| CD45          | 154 Sm  | HI30       | Fluidigm    |
| CD90          | 159 Tb  | 5E10       | Fluidigm    |
| CD14          | 160 Gd  | M5E2       | Fluidigm    |
| CD11c         | 162 Dy  | Bu15       | Fluidigm    |
| CD161         | 164 Dy  | HP-3G10    | Fluidigm    |
| CD127         | 165 Ho  | A019D5     | Fluidigm    |
| CD25          | 169 Tm  | 2A3        | Fluidigm    |
| CD3           | 170 Er  | UCHT1      | Fluidigm    |
| HLA-DR        | 174 Yb  | L243       | Fluidigm    |
| CD56          | 176 Yb  | NCAM16.2   | Fluidigm    |
| IL-22         | 150 Nd  | 22URTI     | Fluidigm    |
| T-bet         | 161 Dy  | 4B10       | eBioscience |
| IFN- $\gamma$ | 168 Er  | B27        | Fluidigm    |

**TABLE E3.** Primers for RT-PCR

|              |           |                          |
|--------------|-----------|--------------------------|
| <i>ACTB</i>  | Sense     | GGATGCAGAAGGAGATCACT     |
|              | Antisense | CGATCCACACGGAGTACTTG     |
| <i>AHR</i>   | Sense     | AATACAAAGCCATTCAGAGCC    |
|              | Antisense | CAGAAAACAGTAAAGCCAATC C  |
| <i>ID2</i>   | Sense     | TCAGCCTGCATCACCAGAGA     |
|              | Antisense | CTGCAAGGACAGGATGCTGATA   |
| <i>IFNG</i>  | Sense     | CTAATTATTCGGTAACTGACTTGA |
|              | Antisense | ACAGTTCAGCCATCACTTGGA    |
| <i>IL17A</i> | Sense     | CGATCCACCTCACCTTGGA      |
|              | Antisense | CTCCCAGATCACAGAGGGATATCT |
| <i>IL22</i>  | Sense     | CCCATCAGCTCCCCTGC        |
|              | Antisense | GCTCACTCATACTGACTCCGT    |
| <i>IL26</i>  | Sense     | TCAACAGCTTGGGACAATGTTT   |
|              | Antisense | TTTGAGGTGTGGGTTGCTGTTA   |
| <i>IL23R</i> | Sense     | AACAACAGCTCGGCTTTGGT     |
|              | Antisense | GGAATATCTGGCGGATAT       |
| <i>PLZF</i>  | Sense     | TCTGACAAAGATGGGGATGATCC  |
|              | Antisense | CAGTATTCGGTGCAGATGGTACAC |
| <i>PRF1</i>  | Sense     | AGGAGCTGGGCAGAAGGACAAGA  |
|              | Antisense | CACCATAGAGGGCACAAAGGAAGG |
| <i>RORC</i>  | Sense     | TGAGAAGGACAGGGAGCCAA     |
|              | Antisense | CCACAGATTTTGCAAGGGATCA   |
| <i>TBX21</i> | Sense     | GATGTTTGTGGACGTGGTCTTG   |
|              | Antisense | CTTCCACACTGCACCCACTT     |
